# Supplementary material
Source: PubMed Central journal article supplement (PMC4285341)
Supplement: NIHMS648812-supplement-Supplement.pdf [file NIHMS648812-supplement-Supplement.pdf]

## Supplementary Material

### Movie Legends

**Movie 1. Termination of  $I_{Ca,L}$ -mediated reentry by slow activation of  $I_{KATP}$  over 5 minutes (first 90 s shown).** A stable  $I_{Ca,L}$ -mediated spiral wave is initially present in the center of heterogeneous bi-excitabile tissue (4.5 x 4.5 cm), with intermittent  $I_{Na}$ -mediated wavefronts appearing in the periphery, as indicated by the transient rapidly-conducting bulges along the spiral arm. Slow  $I_{KATP}$  activation gradually converts the stable  $I_{Ca,L}$ -mediated spiral to a meandering  $I_{Na,L}$ -mediated spiral wave, which eventually terminates by collision with the tissue border (near 86,000 ms).

**Movie 2. Conversion of  $I_{Ca,L}$ -mediated reentry to  $I_{Na}$ -mediated reentry by rapid activation of  $I_{KATP}$  over 50 ms.** A stable  $I_{Ca,L}$ -mediated spiral wave is initially present in the center of heterogeneous bi-excitabile tissue (4.5 x 4.5 cm), with intermittent  $I_{Na}$ -mediated wavefronts appearing in the periphery, as indicated by the transient rapidly-conducting bulges along the spiral arm. Rapid  $I_{KATP}$  activation over 50 ms (beginning at 500 ms) rapidly shortens APD and converts the stable  $I_{Ca,L}$ -mediated spiral to a stable  $I_{Na,L}$ -mediated spiral wave.

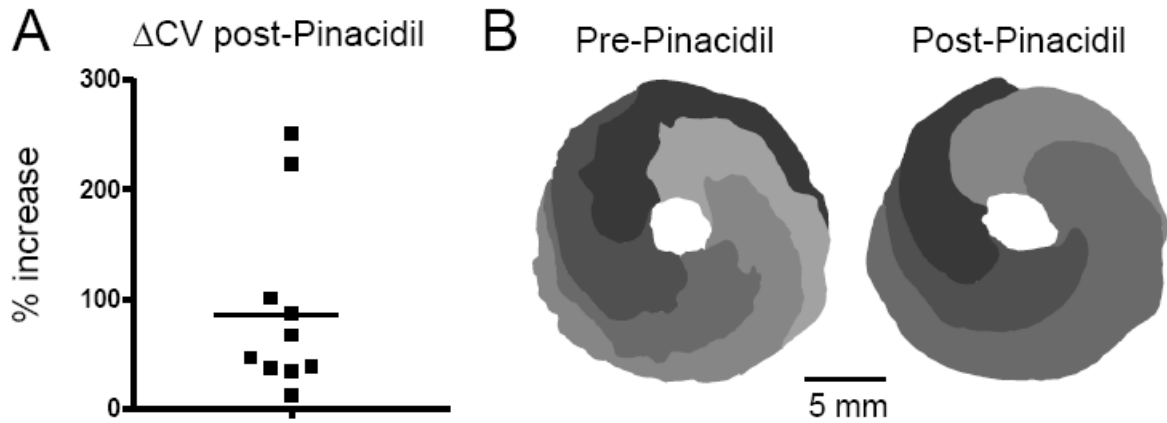

**Figure 6. Effects of pinacidil on conduction velocity of EAD-mediated reentry around a central obstacle in NRVM monolayers.** **A.** The percent increase in conduction velocity after pinacidil in 10 monolayers (solid squares) in which BayK4688 + isoproterenol induced sustained reentry around a central obstacle. Mean increase is indicated by the horizontal bar. **B.** Isochrome map during reentry in a representative monolayer, pre- and post-pinacidil treatment. Increased spacing between 80 ms isochrome lines post-pinacidil reflects increased conduction velocity.

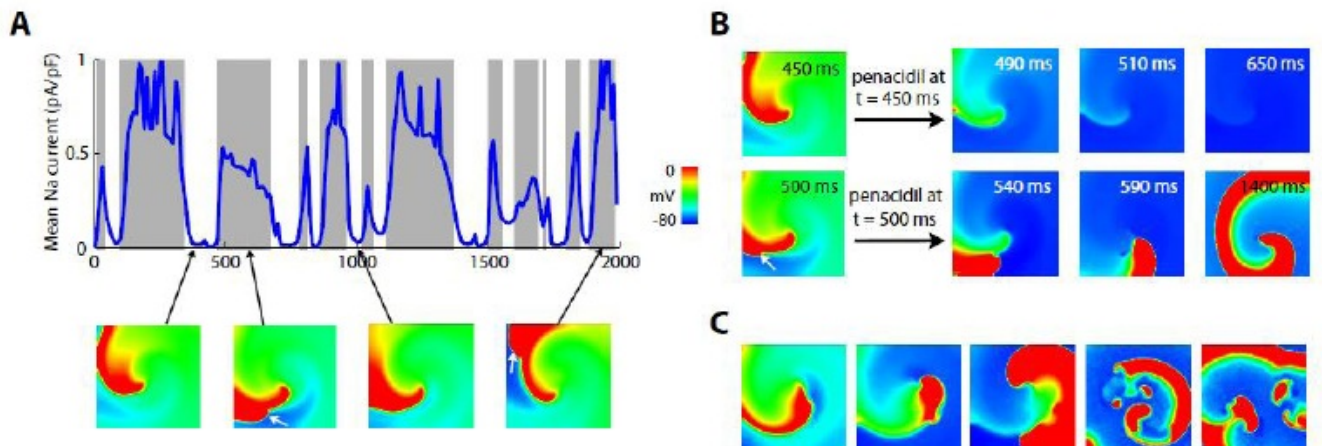

**Figure 7. Effect of  $I_{KATP}$  activation on  $I_{Ca,L}$ -mediated reentry in simulated 2D heterogeneous cardiac tissue (300 x 300 myocytes).** A. Outcomes of rapidly activating  $I_{KATP}$  at various time points during reentry driven by an  $I_{Ca,L}$ -mediated rotor in the center of the tissue. Grey zones indicate that  $I_{Ca,L}$ -mediated reentry converted to  $I_{Na}$ -mediated reentry after  $I_{KATP}$  activation, white zones that reentry terminated. The blue line shows  $I_{Na}$  amplitude averaged over all cells in the tissue over time.  $I_{KATP}$  activation terminated reentry only if no significant  $I_{Na}$ -mediated wavefronts were present. Voltage snapshots (below) show the  $I_{Ca,L}$ -mediated rotor in the center of the tissue, with  $I_{Na}$ -mediated wavefronts intermittently present along the spiral arm (2<sup>nd</sup> and 4<sup>th</sup> panels, white arrows). B. Voltage snapshots showing termination of reentry by  $I_{KATP}$  activation at  $t=450$  ms (top row), but conversion to  $I_{Na}$ -mediated reentry at  $t=500$  ms (bottom row). C. When the number  $K_{ATP}$  channels was randomly varied from myocyte to myocyte (using a Gaussian distribution with mean 3.8 channels/ $\mu\text{m}^2$  and standard deviation 2.0),  $I_{KATP}$  activation caused the stable  $I_{Ca,L}$ -mediated rotor to convert to an  $I_{Na}$ -mediated rotor, which then broke up into multi-wavelet VF.
